# Supplementary material for: Highly flexible transparent conductive graphene/single-walled carbon nanotube nanocomposite films produced by Langmuir–Blodgett assembly
Source: Royal Society of Chemistry journal article supplement (doi:10.1039/c5ra00708a), 2015-01-01
Supplement: c5ra00708a1.pdf [file c5ra00708a1.pdf]

## Supporting information:

### Highly flexible transparent conductive graphene /single-walled carbon nanotube nanocomposite films produced by Langmuir–Blodgett assembly

Tan Yang,<sup>a</sup> Junhe Yang,<sup>\*a</sup> Lifang Shi,<sup>a</sup> Edith Mäder,<sup>b</sup> and Qingbin Zheng,<sup>\*a,b</sup>

<sup>a</sup>School of Materials Science and Engineering, University of Shanghai for Science and Technology, Shanghai 200093, China. Tel.: 86-21-55274065

10 E-mail address: qingbin.zheng@family.usst.hk (Q.B. Zheng), jhyang@usst.edu.cn (J.H. Yang)

<sup>b</sup>Leibniz-Institut für Polymerforschung Dresden, Hohe Straße 6, 01069 Dresden, Germany. Tel.: 49-0351-4658486

15

20

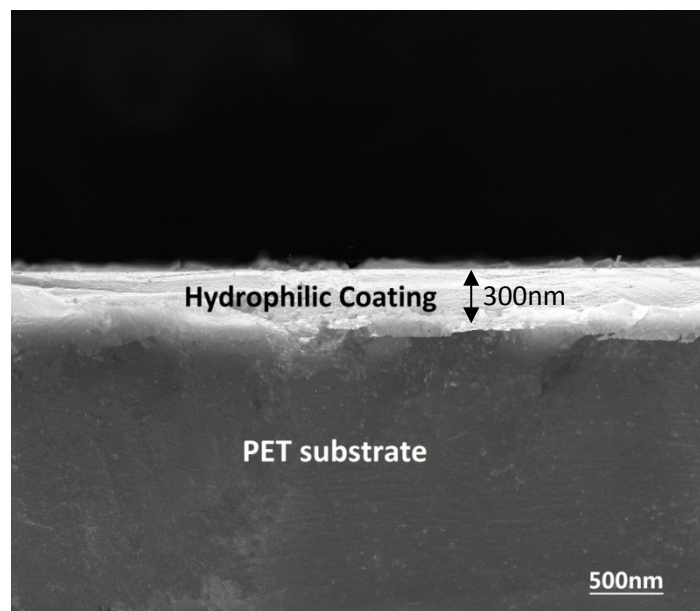

**Fig. S1** Cross-sectional SEM micrograph of PET after hydrophilic coating.

25

30

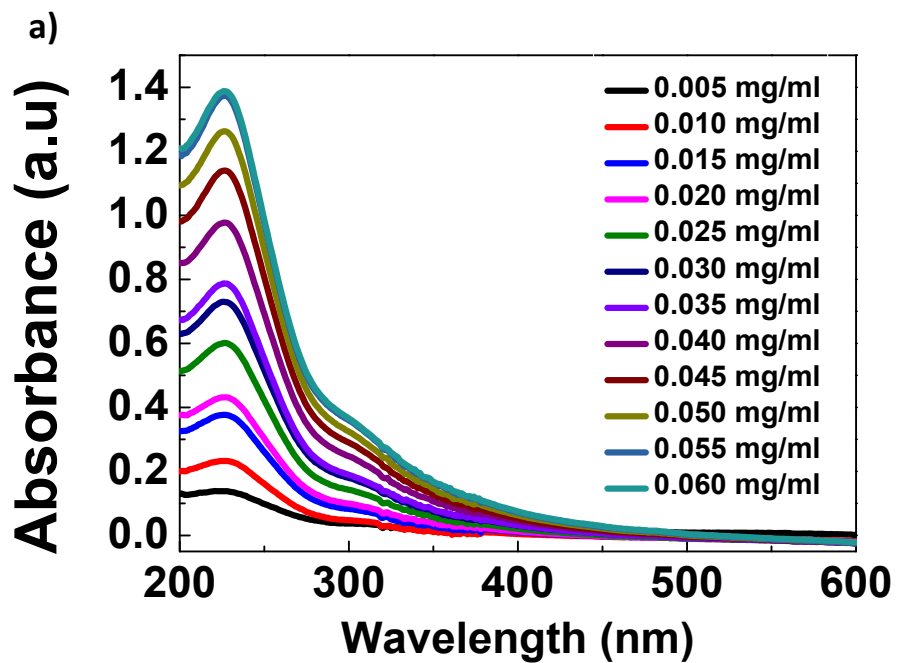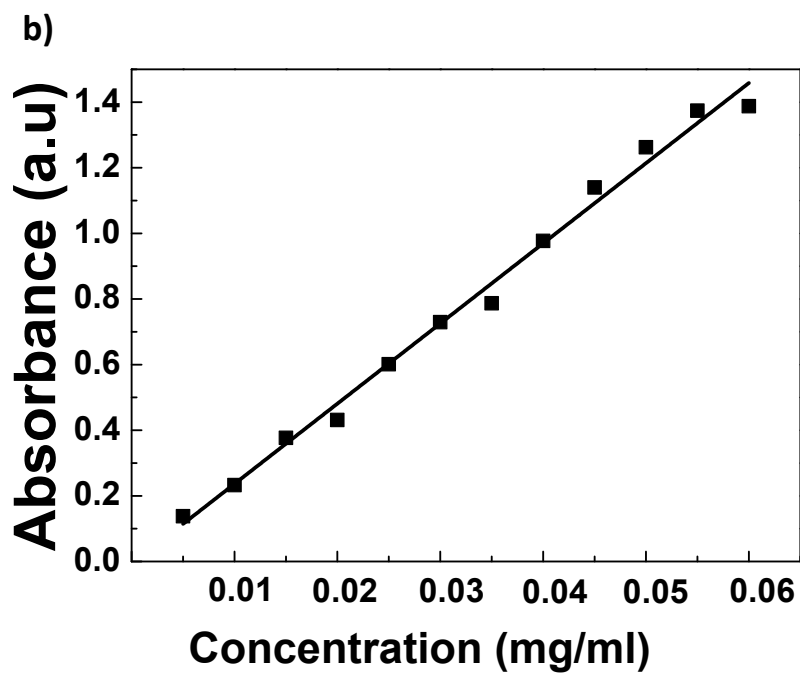

5

**Fig. S2** (a) UV - vis spectra of UL-GO dispersed in water at varied concentrations. (b) Absorption at the peak as a function of the concentration of UL-GO.

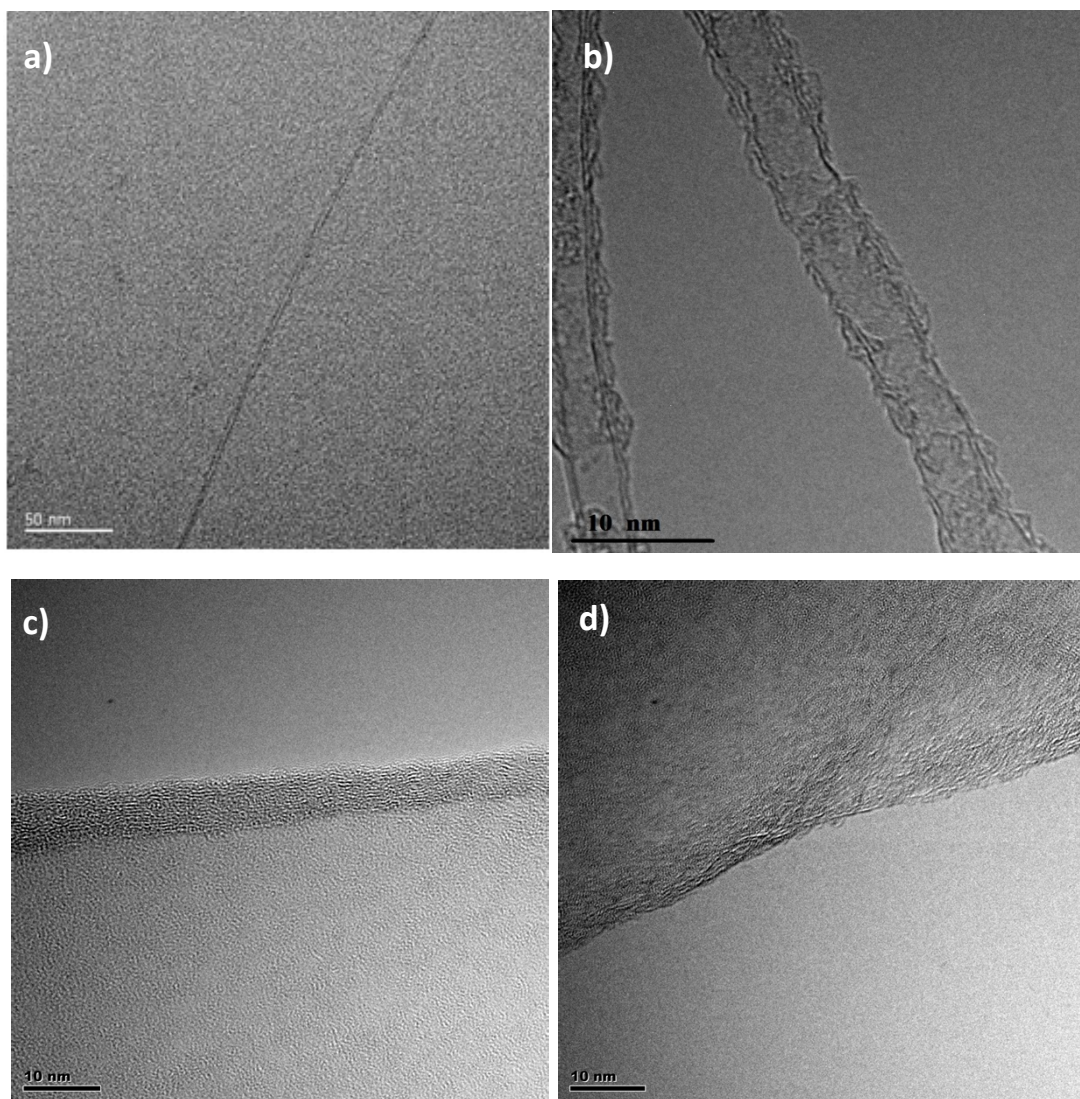

5

**Fig. S3** TEM images of the COOH-functionalized SWCNTs (a-b) and GO sheet (c-d).

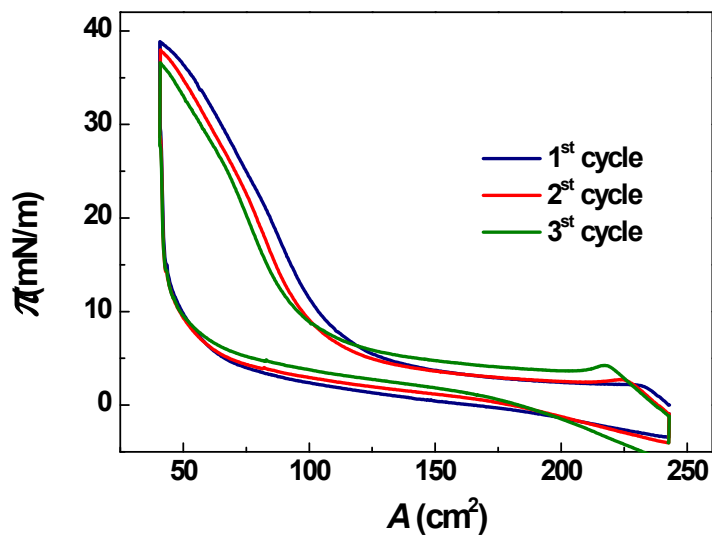

**Fig. S4** Isotherm plots of three sequential compression/expansion cycles, confirming highly reversible and stable SWCNT monolayer against compression. The three curves essentially overlap on top of another over the whole area.

**Table S1** Relative percentages of carbon and assignments of UL-GO/SWCNT and rUL-GO/SWCNT.

| Binding energy and<br>assignment | C-C $sp^2$ | C=C $sp^3$ | C-O       | -C=O      | -O-C=O    |
|----------------------------------|------------|------------|-----------|-----------|-----------|
|                                  | ~284.8 eV  | ~285.6 eV  | ~286.6 eV | ~287.8 eV | ~290.3 eV |
| UL-GO/SWCNT                      | 30.12%     | 20.51%     | 29.49%    | 17.69%    | 2.29%     |
| HI-rUL-GO/SWCNT                  | 51.95%     | 19.10%     | 13.10%    | 12.73%    | 1.92%     |

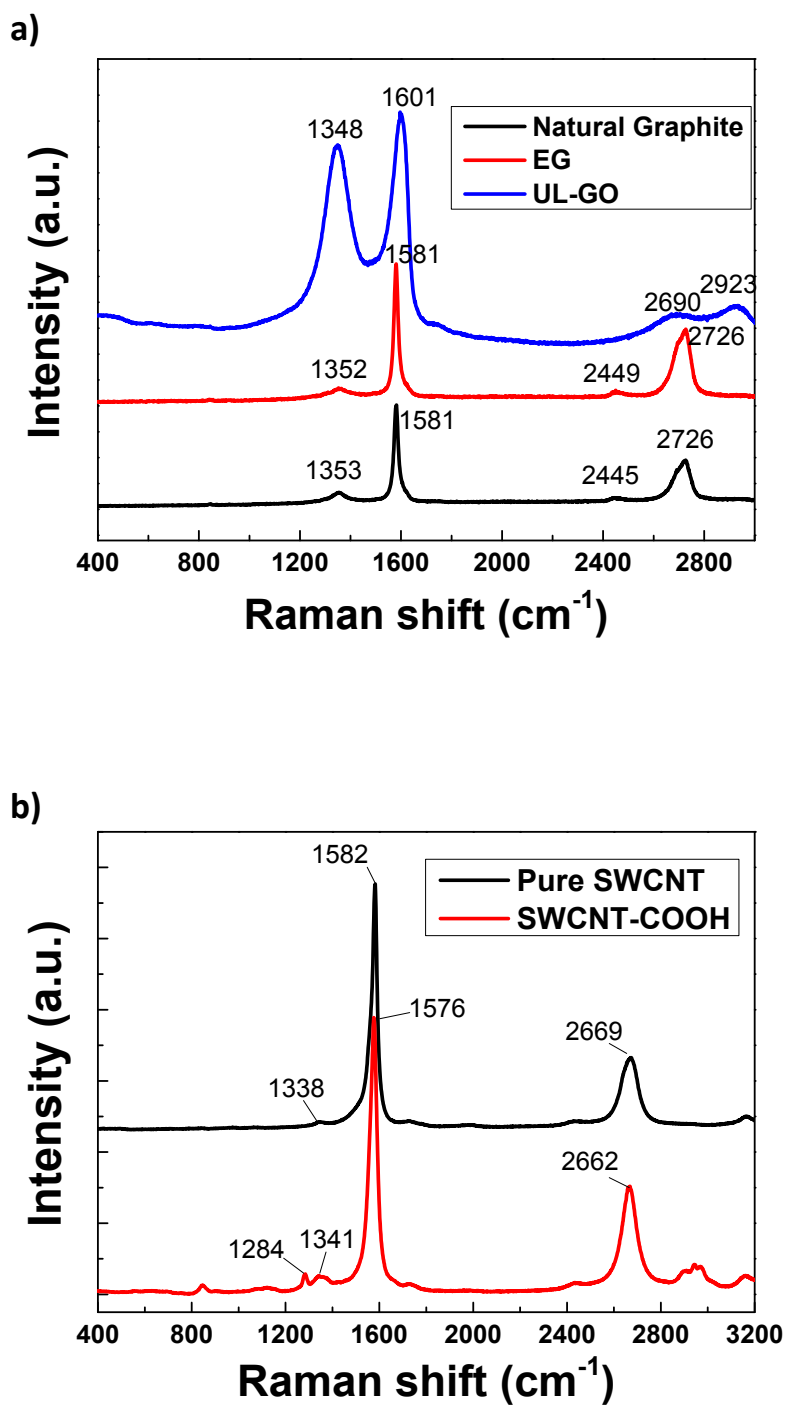

**Fig. S5** (a) Raman spectra for natural graphite, EG and UL-GO. (b) Raman spectra for pure SWCNT 5 and COOH-functionalized SWCNTs.

**Table S2** Comparison of opto-electrical properties for TCFs made by solution based methods.

| Fabrication Method | Graphene Type                                  | Sheet Resistance ( $\Omega/\text{sq}$ ) | Transmittance (%) | $\sigma_{DC}/\sigma_{OP}$ | Reference                                                            |
|--------------------|------------------------------------------------|-----------------------------------------|-------------------|---------------------------|----------------------------------------------------------------------|
| L-B assembly       | Hybrid films with SWCNTs                       | 8100                                    | 90                | 0.443                     | Current work                                                         |
|                    | Expandable graphite exfoliated With DMF        | $1.5 \times 10^5$                       | 92                | 0.03                      | Li <i>et al.</i> <sup>1</sup> Nature Nanotechnol. 2008, 3, 538       |
|                    | High temperature annealing                     | $4.0 \times 10^6$                       | 95                | 0.0018                    | Kim <i>et al.</i> <sup>2</sup> Adv. Mater. 2010, 22, 1954            |
|                    | High temperature annealing                     | 6848                                    | 82                | 0.27                      | Wang <i>et al.</i> <sup>3</sup> Carbon                               |
| Transfer printing  | Chemical reduction                             | $3.0 \times 10^4$                       | 80                | 0.05                      | Liu <i>et al.</i> <sup>4</sup> Nanotechnology 2009, 20, 465605       |
|                    | Chemical Reduction+ High temperature annealing | $1.0 \times 10^5$                       | 65                | 0.008                     | Eda <i>et al.</i> <sup>5</sup> Nature Nanotechnol. 2008, 3, 270      |
|                    | Chemical Reduction+ High temperature annealing | $7.0 \times 10^4$                       | 65                | 0.011                     | Eda <i>et al.</i> <sup>6</sup> APL 2008, 92, 233305                  |
|                    | High temperature annealing                     | 5000                                    | 80                | 0.32                      | Wu <i>et al.</i> <sup>7</sup> APL 2008, 92, 263302                   |
| Spin coating       | High temperature annealing                     | 1750                                    | 70                | 0.55                      | Liang <i>et al.</i> <sup>8</sup> Nanotechnology, 2009, 20, 13 434007 |
| Dip coating        | Chemical reduction                             | $1.1 \times 10^4$                       | 87                | 0.23                      | Zhu <i>et al.</i> <sup>9</sup> APL 2009, 95, 103104                  |
|                    | High temperature annealing                     | 1800                                    | 70                | 0.54                      | Wang <i>et al.</i> <sup>10</sup> Nano Lett. 2008, 8, 323             |
|                    | High temperature annealing                     | 8000                                    | 70                | 0.12                      | Zhao <i>et al.</i> <sup>11</sup> Electrochimica Acta, 2009, 55, 491  |
|                    | Chemical Reduction+ High temperature annealing | $11 \times 10^6$                        | 95                | 0.0007                    | Kim <i>et al.</i> <sup>12</sup> Langmuir, 2009, 25, 11302            |

## References

1. X. L. Li, G. Y. Zhang, X. D. Bai, X. M. Sun, X. R. Wang, E. Wang and H. J. Dai, *Nat Nanotechnol*, 2008, **3**, 538-542.
2. F. Kim, L. J. Cote and J. X. Huang, *Adv Mater*, 2010, **22**, 1954-1958.
- 5 3. S. J. Wang, Y. Geng, Q. B. Zheng and J. K. Kim, *Carbon*, 2010, **48**, 1815-1823.
4. Y. Q. Liu, L. Gao, J. Sun, Y. Wang and J. Zhang, *Nanotechnology*, 2009, **20**, 465605.
5. G. Eda, G. Fanchini and M. Chhowalla, *Nat Nanotechnol*, 2008, **3**, 270-274.
6. G. Eda, Y. Y. Lin, S. Miller, C. W. Chen, W. F. Su and M. Chhowalla, *Appl Phys Lett*, 2008, **92**, 233305.
- 10 7. J. B. Wu, H. A. Becerril, Z. N. Bao, Z. F. Liu, Y. S. Chen and P. Peumans, *Appl Phys Lett*, 2008, **92**, 263302.
8. Y. Y. Liang, J. Frisch, L. J. Zhi, H. Norouzi-Arasi, X. L. Feng, J. P. Rabe, N. Koch and K. Mullen, *Nanotechnology*, 2009, **20**, 434007.
9. Y. W. Zhu, W. W. Cai, R. D. Piner, A. Velamakanni and R. S. Ruoff, *Appl Phys Lett*, 2009, **95**.
- 15 10. X. Wang, L. J. Zhi and K. Mullen, *Nano Lett*, 2008, **8**, 323-327.
11. L. Zhao, L. Zhao, Y. X. Xu, T. F. Qiu, L. J. Zhi and G. Q. Shi, *Electrochim Acta*, 2009, **55**, 491-497.
12. Y. K. Kim and D. H. Min, *Langmuir*, 2009, **25**, 11302-11306.
